# Supplementary material
Source: publisher site journal article supplement (https://www.spandidos-publications.com/1414/downloadSupplementary)

Figure S1. Macrophage-like cells in peripheral blood were detected using flow cytometry with a CD45<sup>+</sup>CD1c<sup>-</sup>CD2<sup>-</sup>CD15<sup>-</sup>CD19<sup>-</sup>CD14<sup>+</sup>CD16<sup>+</sup>CD11b<sup>+</sup> gating strategy. FSC, forward scatter; SSC, side scatter.

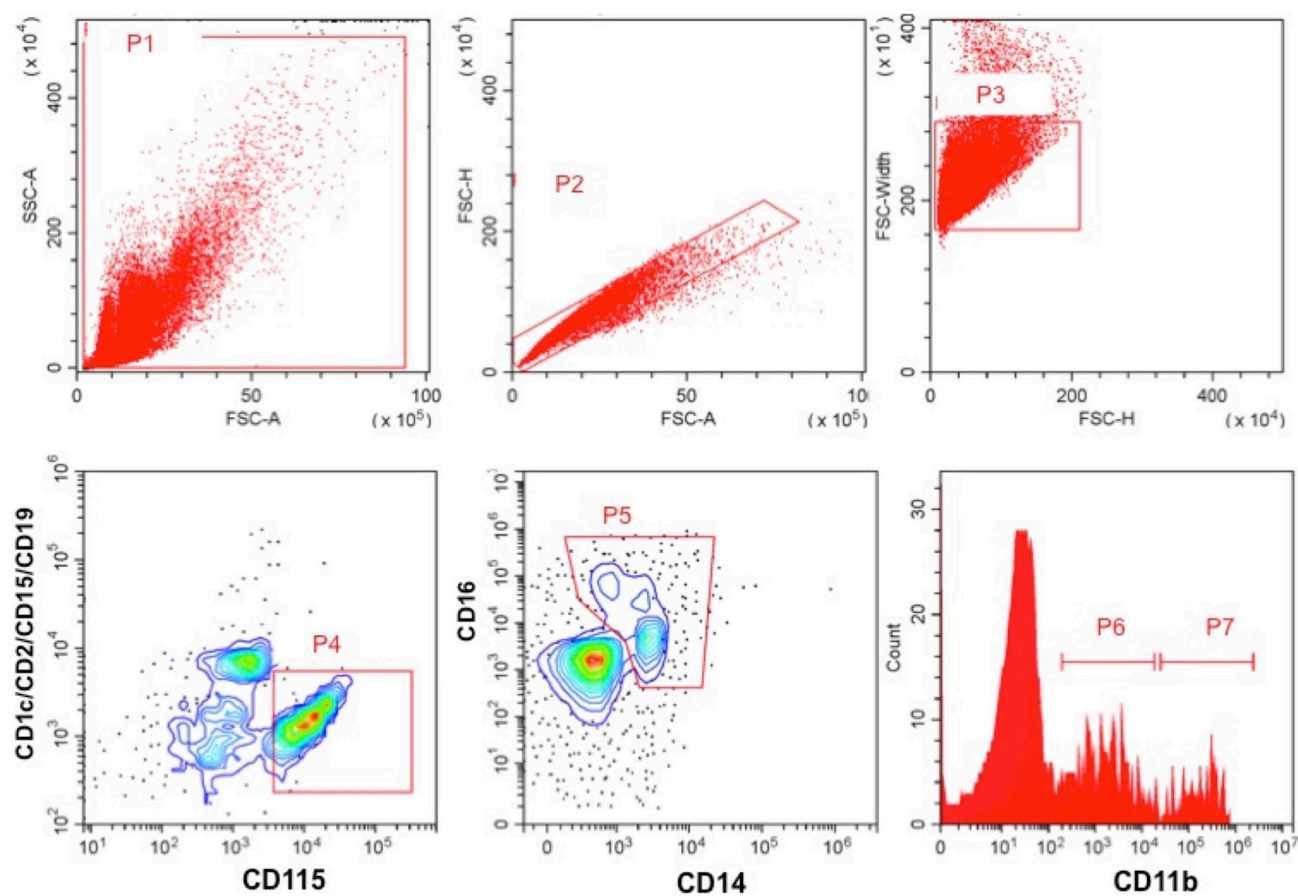

Figure S2. Percentages of macrophage-like cells in the peripheral blood of patients with glioma were not significantly different between patients with advanced (stages III and IV) and those with early (stages I and II) glioma. (A) M1 percentages of CD11b<sup>int</sup> macrophage-like cells in the peripheral blood of patients with glioma were not significantly different between patients with advanced (stages III and IV) and those with early (stages I and II) glioma. (B) M1 percentages of CD11b<sup>hi</sup> macrophage-like cells in the peripheral blood of patients with glioma were not significantly different between patients with advanced (stages III and IV) and those with early (stages I and II) glioma. (C) M2 percentages of CD11b<sup>hi</sup> macrophage-like cells in the peripheral blood of patients with glioma were not significantly different between patients with advanced (stages III and IV) and those with early (stages I and II) glioma. n.s., not significant ( $P>0.05$ ); int, intermediate; hi, high.

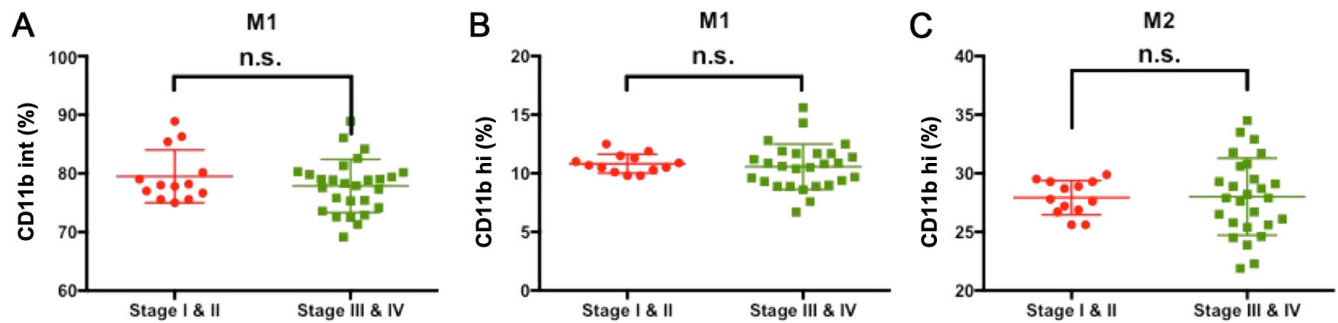

Figure S3. Percentages of macrophage-like cells were not significantly different between patients with glioma with low YKL-40 expression and those with high YKL-40 expression. (A) M1 percentages of CD11b<sup>int</sup> macrophage-like cells were not significantly different between patients with glioma with low YKL-40 expression and those with high YKL-40 expression. (B) M1 percentages of CD11b<sup>hi</sup> macrophage-like cells were not significantly different between patients with glioma with low YKL-40 expression and those with high YKL-40 expression. (C) M2 percentages of CD11b<sup>hi</sup> macrophage-like cells were not significantly different between patients with glioma with low YKL-40 expression and those with high YKL-40 expression. n.s., not significant ( $P>0.05$ ); int, intermediate.

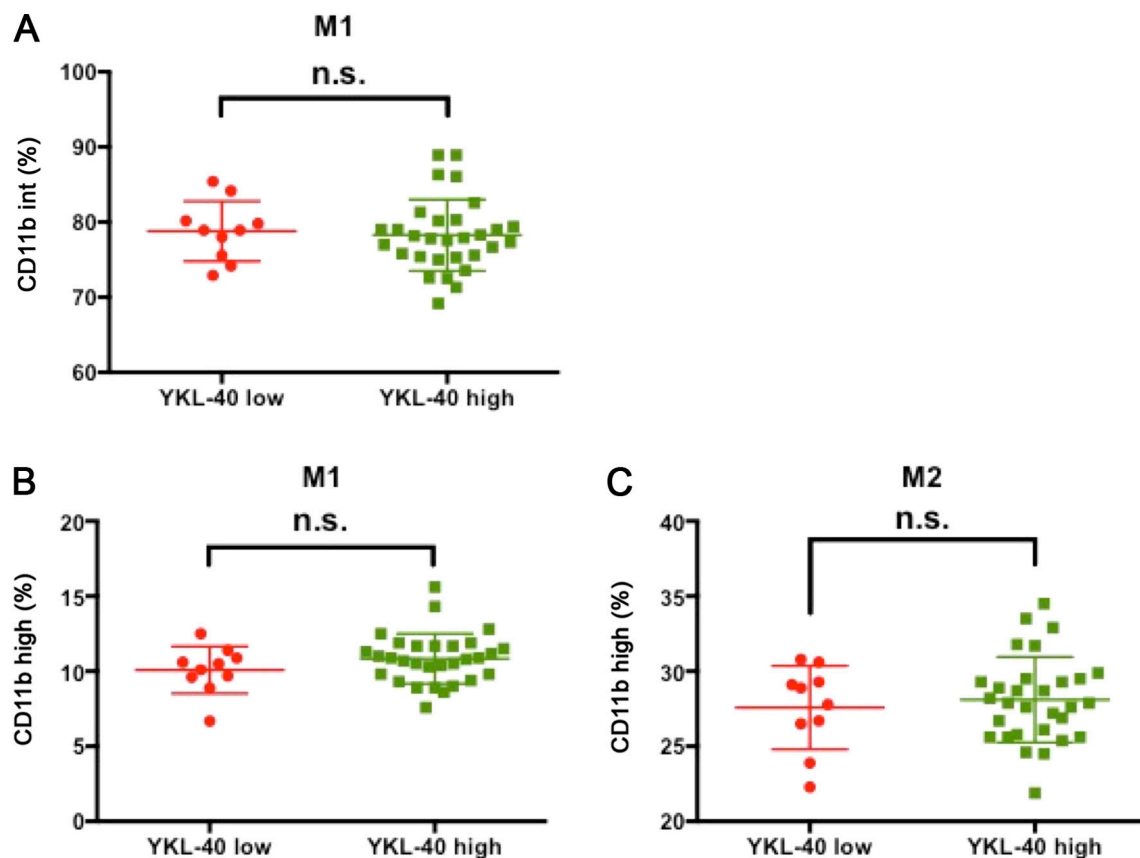

Supplement: Supplementary file 1 [file downloadSupplementary]
